# Supplementary material
Source: publisher site journal article supplement (https://www.spandidos-publications.com/4523/downloadSupplementary)

Figure S1. EphA3-CD47-Akt signaling pathway may induce radioresistance in HNC. (A) p-AKT expression was investigated after CD47-silencing in the HN31R cell line for identification of relationship of CD47 and AKT using western blotting. (B) CD47 and p-AKT expression was assessed after EphA3-silencing using western blotting in HN31R cell line for the investigation of EphA3/CD47/p-AKT signaling pathway. p-, phosphorylated; HNC, head and neck cancer; scRNA, small conditional RNA; si, small interfering; EphA3, EPH receptor A3.

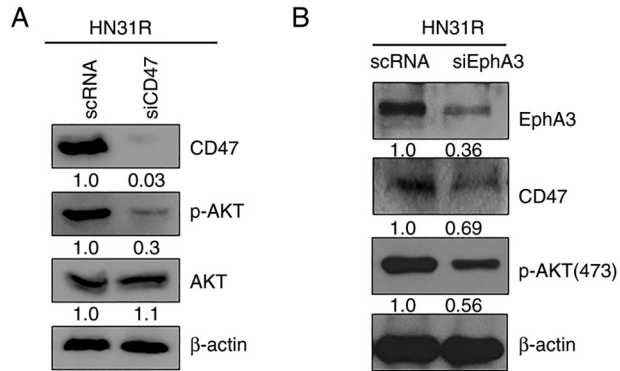

Supplement: Supplementary file 1 [file downloadSupplementary]
